# Supplementary material for: Randomized trial of primary debulking surgery versus neoadjuvant chemotherapy for advanced epithelial ovarian cancer (SCORPION-NCT01461850)
Source: HighWire-hosted journal article supplement (doi:10.1136/ijgc-2020-001640), 2020-10-07
Supplement: ijgc-2020-001640supp005_data_supplement.pdf [file ijgc-2020-001640supp005_data_supplement.pdf]

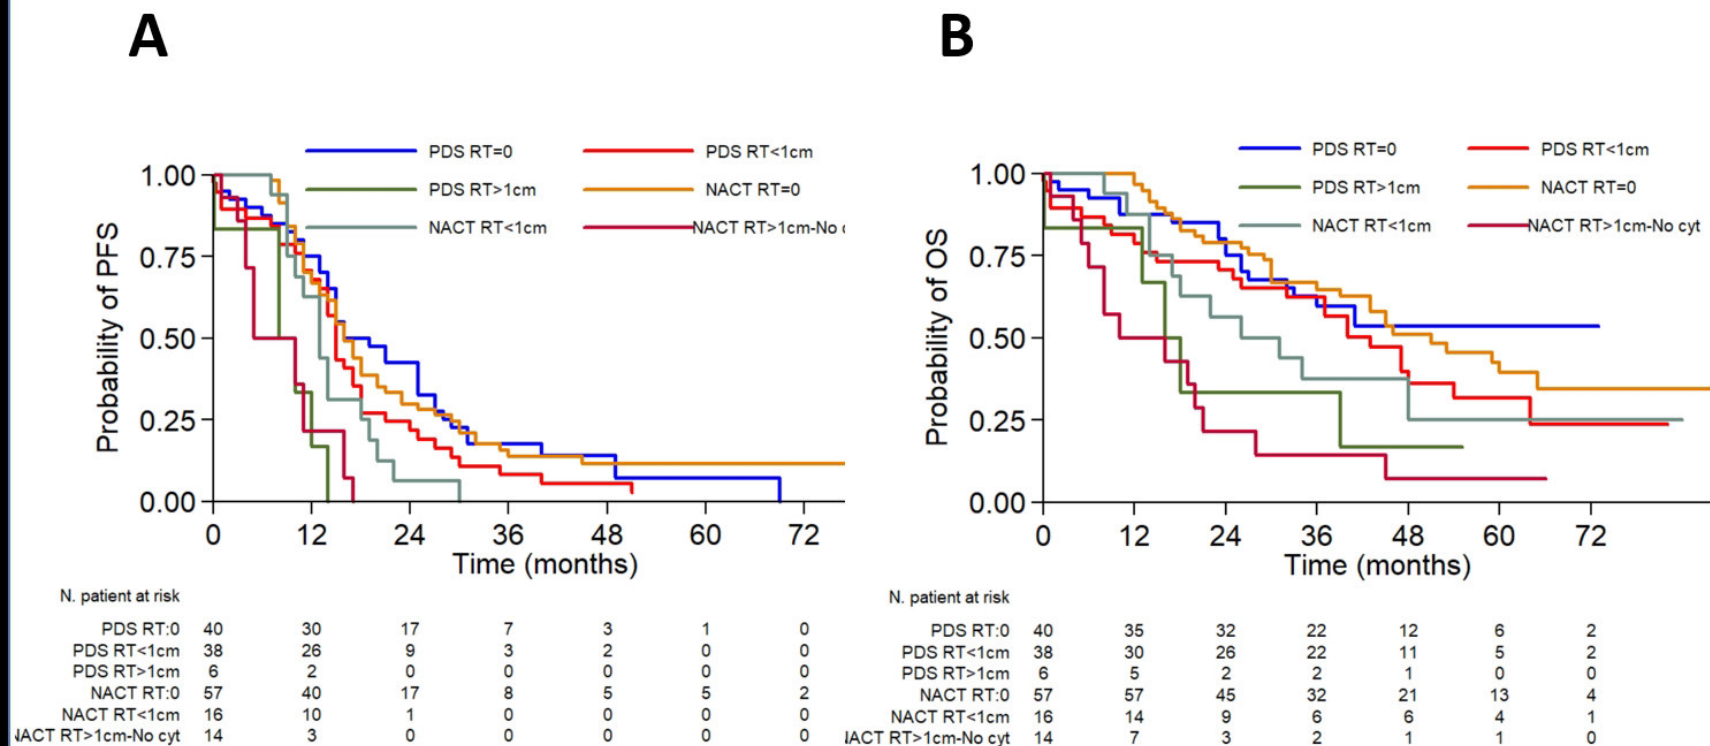

Kaplan-Meier plots for (A) Progression-free survival (PFS) and (B) Overall Survival (OS) in the intention-to-treat population by RT and Arm. HR, hazard ratio; RT= Residual Tumor
